# Supplementary material
Source: MDPI journal article supplement (https://www.mdpi.com/2305-7084/7/5/99)
Supplement: s1 [file s1]

## Supplementary Information

**Table A1.** Coefficients in polynormal regression of dielectric constant for pure solvents

|       | B <sub>0</sub> | B <sub>1</sub> | B <sub>2</sub>         | B <sub>3</sub>           | B <sub>4</sub>          |
|-------|----------------|----------------|------------------------|--------------------------|-------------------------|
| Water | 176            | 0              | -0.328                 | 0                        | 0                       |
| MeOH  | 104.62         | 1000           | 9.018410 <sup>-2</sup> | -2.5998 10 <sup>-3</sup> | 4.8503 10 <sup>-6</sup> |
| EtOH  | 68.47          | 0              | -0.146                 | 0                        | 0                       |
| PrOH  | 100            | 0              | -0.37                  | 3.6 10 <sup>-4</sup>     | 0                       |
| ButOH | 82.31          | 0              | -0.304                 | 3.0 10 <sup>-4</sup>     | 0                       |

**Table A2:** Binary interaction parameters of water/ethanol/methanol

| System          | $\alpha_{ij}$ | $\tau_{ij}$                             | $\tau_{ji}$                             |
|-----------------|---------------|-----------------------------------------|-----------------------------------------|
| Water<br>/EtOH  | 0.18          | $\frac{(814.903 + 2.0078T)}{RT}$        | $\frac{(-697.613 + 0.9765T)}{RT}$       |
| Water<br>/MeOH  | 0.10          | $0.019T^2 - 21.66T + 2049$              | $-0.019T^2 + 10.68T - 1730$             |
| Water<br>/PrOH  | 0.3           | $5.3852 - \frac{1005.06}{T}$            | $-2.5041 + \frac{850.78}{T}$            |
| Water<br>/ButOH | 0.45          | $-0.0237T - \frac{2016.15}{T} + 19.447$ | $-0.0527T - \frac{3884.3}{T} + 30.3191$ |

**Table A3:** Solubility of KDP in water.

| T, [K]                        | x, [-] | T, [K]                         | x, [-] |
|-------------------------------|--------|--------------------------------|--------|
| <i>Isothermal measurement</i> |        | <i>Polythermal measurement</i> |        |
| 308.15                        | 0.0383 | 314.59                         | 0.0426 |
| 313.15                        | 0.042  | 318.15                         | 0.0459 |
| 318.15                        | 0.0459 | 318.29                         | 0.0454 |
| 323.15                        | 0.0495 | 319.49                         | 0.0469 |
| 328.15                        | 0.0531 | 322.72                         | 0.0497 |
| 333.15                        | 0.0589 | 323.15                         | 0.0495 |
|                               |        | 324.93                         | 0.0517 |
|                               |        | 325.48                         | 0.0526 |
|                               |        | 328.15                         | 0.0531 |
|                               |        | 333.15                         | 0.0589 |
|                               |        | 338.15                         | 0.0643 |

**Table A4:** Solubility of KDP in EtOH-water mixed solvents.

| T, [K]        | x, [-] | T, [K]         | x, [-] | T, [K]         | x, [-] | T, [K]         | x, [-] |
|---------------|--------|----------------|--------|----------------|--------|----------------|--------|
| 5% (w/w) EtOH |        | 10% (w/w) EtOH |        | 15% (w/w) EtOH |        | 20% (w/w) EtOH |        |
| 316.3         | 0.0332 | 316.75         | 0.0248 | 310.5          | 0.0172 | 315.71         | 0.0161 |
| 321.7         | 0.0367 | 318.15         | 0.0275 | 314.4          | 0.0187 | 318.15         | 0.0164 |
| 324.8         | 0.0393 | 318.75         | 0.0276 | 318.1          | 0.0205 | 323.15         | 0.0185 |
| 327           | 0.0412 | 323.15         | 0.0296 | 322.6          | 0.0226 | 323.55         | 0.0184 |
| 333.3         | 0.0462 | 324.39         | 0.0299 | 327.3          | 0.0255 | 328.15         | 0.0208 |
|               |        | 325.56         | 0.0312 | 332.2          | 0.0282 | 333.15         | 0.0234 |
|               |        | 328.15         | 0.0329 |                |        | 338.15         | 0.0254 |
|               |        | 333.15         | 0.0371 |                |        |                |        |
|               |        | 338.15         | 0.0417 |                |        |                |        |

**Table A5:** Solubility of KDP in MeOH-water mixed solvents.

| T, [K]        | x, [-] | T, [K]         | x, [-] | T, [K]         | x, [-] |
|---------------|--------|----------------|--------|----------------|--------|
| 5% (w/w) MeOH |        | 10% (w/w) MeOH |        | 15% (w/w) MeOH |        |
| 302.95        | 0.0275 | 310.67         | 0.024  | 303.65         | 0.0163 |
| 309.05        | 0.0312 | 311.43         | 0.0249 | 306.55         | 0.0176 |
| 317.05        | 0.0364 | 314.75         | 0.0266 | 309.95         | 0.0191 |
| 322.15        | 0.0397 | 316.84         | 0.0285 | 314.65         | 0.0214 |
| 325.25        | 0.0418 | 318.81         | 0.0297 | 318.75         | 0.0224 |
| 327.35        | 0.0434 | 322.53         | 0.0318 | 323.45         | 0.0257 |
| 332.95        | 0.0477 | 324.72         | 0.0334 | 328.35         | 0.0276 |
|               |        | 327.41         | 0.0351 | 333.65         | 0.0312 |
|               |        | 330.46         | 0.0378 |                |        |

**Table A6:** Solubility of KDP in PrOH-water mixed solvents.

| T, [K]        | x, [-] | T, [K]         | x, [-] | T, [K]         | x, [-] |
|---------------|--------|----------------|--------|----------------|--------|
| 5% (w/w) PrOH |        | 10% (w/w) PrOH |        | 15% (w/w) PrOH |        |
| 303.13        | 0.0294 | 303.05         | 0.023  | 303.94         | 0.0176 |
| 308.42        | 0.0326 | 308.31         | 0.0251 | 308.45         | 0.0196 |
| 313.56        | 0.0362 | 310.38         | 0.0266 | 311.55         | 0.0209 |
| 314.31        | 0.0371 | 315.55         | 0.0287 | 313.44         | 0.0216 |
| 320.63        | 0.0402 | 318.15         | 0.0321 | 315.75         | 0.0235 |
| 324.25        | 0.0428 | 322.05         | 0.0344 | 318.81         | 0.0241 |
| 330.65        | 0.0482 | 329.75         | 0.0395 | 321.92         | 0.0256 |
|               |        |                |        | 328.74         | 0.0298 |

**Table A7:** Solubility of KDP in ButOH-water mixed solvents.

| T, [K]         | x, [-] | T, [K]          | x, [-] | T, [K]          | x, [-] |
|----------------|--------|-----------------|--------|-----------------|--------|
| 5% (w/w) ButOH |        | 10% (w/w) ButOH |        | 15% (w/w) ButOH |        |
| 303.14         | 0.0325 | 305.05          | 0.0251 | 302.12          | 0.0176 |
| 305.55         | 0.0334 | 311.12          | 0.0281 | 308.43          | 0.0213 |
| 311.19         | 0.0373 | 313.14          | 0.0297 | 314.75          | 0.0241 |

|        |        |        |        |        |        |
|--------|--------|--------|--------|--------|--------|
| 315.69 | 0.0399 | 315.25 | 0.0319 | 316.63 | 0.0251 |
| 317.63 | 0.0414 | 320.03 | 0.0348 | 320.19 | 0.0269 |
| 322.69 | 0.0447 | 323.12 | 0.0367 | 323.25 | 0.0285 |
| 326.19 | 0.0479 | 327.94 | 0.0404 | 330.56 | 0.0336 |
|        |        |        |        | 333.26 | 0.0362 |

**Table A8:** Solubility of KDP in MeOH-EtOH-water mixed solvents.

| T, [K]                    | x, [-] | T, [K]                    | x, [-] | T, [K]                    | x, [-] |
|---------------------------|--------|---------------------------|--------|---------------------------|--------|
| 2.5:2.5 % (w/w) MeOH-EtOH |        | 5.0:5.0 % (w/w) MeOH-EtOH |        | 7.5:7.5 % (w/w) MeOH-EtOH |        |
| 308.55                    | 0.0301 | 312.96                    | 0.0274 | 304.65                    | 0.0179 |
| 311.71                    | 0.0322 | 316.96                    | 0.0299 | 307.25                    | 0.0195 |
| 314.15                    | 0.0334 | 318.28                    | 0.0315 | 308.75                    | 0.0208 |
| 320.15                    | 0.0381 | 321.71                    | 0.0337 | 312.9                     | 0.0219 |
| 327.34                    | 0.0428 | 326.21                    | 0.0360 | 318.35                    | 0.0250 |
| 332.34                    | 0.0462 | 332.96                    | 0.0415 | 331.55                    | 0.0325 |
|                           |        | 333.65                    | 0.0420 | 335.65                    | 0.0346 |

**Table A9:** Solubility of KDP in water cited from literature [50].

| T, [K] | S, [kg/kg water] | T, [K] | S, [kg/kg water] |
|--------|------------------|--------|------------------|
| 293.1  | 0.2165           | 317.4  | 0.3558           |
| 298.7  | 0.2467           | 321.5  | 0.3844           |
| 303.2  | 0.2689           | 324.6  | 0.4122           |
| 304.4  | 0.2768           | 330.2  | 0.4491           |
| 309.4  | 0.3079           | 333.7  | 0.4823           |
| 321.6  | 0.324            | 317.4  | 0.3558           |
| 293.1  | 0.2165           |        |                  |
| 298.7  | 0.2467           |        |                  |

**Table A10:** Solubility of KDP in EtOH-water cited from literature [50].

| T, [K]        | S, [kg/kg water] | T, [K]         | S, [kg/kg water] | T, [K]         | S, [kg/kg water] | T, [K]         | S, [kg/kg water] |
|---------------|------------------|----------------|------------------|----------------|------------------|----------------|------------------|
| 5% (w/w) EtOH |                  | 10% (w/w) EtOH |                  | 15% (w/w) EtOH |                  | 20% (w/w) EtOH |                  |
| 292.7         | 0.1465           | 293            | 0.1139           | 293.2          | 0.0883           | 292.8          | 0.0613           |
| 297.4         | 0.172            | 300.7          | 0.1412           | 298.2          | 0.1023           | 297.8          | 0.0751           |
| 303.3         | 0.1996           | 303.5          | 0.1517           | 302.6          | 0.1146           | 302.9          | 0.0888           |
| 310           | 0.2324           | 308.4          | 0.1699           | 305.8          | 0.124            | 307            | 0.1              |
| 316.3         | 0.2628           | 312.8          | 0.1869           | 310.5          | 0.1399           | 310.9          | 0.11             |
| 321.7         | 0.2935           | 317.3          | 0.2079           | 314.4          | 0.1523           | 314.1          | 0.12             |
| 324.8         | 0.3153           | 321.2          | 0.2289           | 318.1          | 0.1671           | 317.9          | 0.1331           |
| 327           | 0.3312           | 327.3          | 0.26             | 322.6          | 0.1849           | 322.1          | 0.1488           |
| 333.3         | 0.373            |                |                  | 327.3          | 0.2053           | 329.1          | 0.1723           |
| 292.7         | 0.1465           |                |                  | 332.2          | 0.2317           | 333.2          | 0.1928           |

**Table A11.** Estimated parameters for the modified Apelblat's and Bromley's equations. Mixed solvents composed from x% alcohols and (100-x)% water (on weight basis).

| SLE<br>Set       | Solvent                | Apelblat's parameter |          |          |
|------------------|------------------------|----------------------|----------|----------|
|                  |                        | a/R                  | b/R      | c        |
| 1 <sup>st</sup>  | Water                  | -825.4(81)           | 2.82(21) | -17.6(4) |
| 2 <sup>nd</sup>  | 5%EtOH                 | -834.4(25)           | 4.00(75) | -23.8(4) |
| 3 <sup>rd</sup>  | 10%EtOH                | -839.6(77)           | 4.70(82) | -28.1(2) |
| 4 <sup>th</sup>  | 15%EtOH                | -840.3(98)           | 4.74(58) | -28.5(9) |
| 5 <sup>th</sup>  | 20%EtOH                | -839.6(72)           | 4.70(89) | -28.1(2) |
| 6 <sup>th</sup>  | 5%MeOH                 | -830.0(25)           | 3.41(98) | -20.3(8) |
| 7 <sup>th</sup>  | 10%MeOH                | -839.5(22)           | 4.70(60) | -28.0(1) |
| 8 <sup>th</sup>  | 15%MeOH                | -835.4(51)           | 4.08(30) | -24.6(9) |
| 9 <sup>th</sup>  | 5%PrOH                 | -826.2(56)           | 2.90(04) | -17.3(6) |
| 10 <sup>th</sup> | 10%PrOH                | -835.6(73)           | 4.17(71) | -24.9(0) |
| 11 <sup>th</sup> | 15%PrOH                | -834.3(60)           | 3.94(96) | -23.8(6) |
| 12 <sup>th</sup> | 5%ButOH                | -825.3(29)           | 2.78(28) | -16.6(1) |
| 13 <sup>th</sup> | 10%ButOH               | -834.1(82)           | 3.98(05) | -23.7(1) |
| 14 <sup>th</sup> | 15%ButOH               | -837.8(89)           | 4.45(24) | -26.6(7) |
| 15 <sup>th</sup> | 2.5%:2.5%<br>MeOH+EtOH | -834.3(17)           | 3.94(30) | -23.8(1) |
| 16 <sup>th</sup> | 5.0%:5.0%<br>MeOH+EtOH | -841.0(48)           | 4.91(48) | -29.2(4) |
| 17 <sup>th</sup> | 7.5%:7.5%<br>MeOH+EtOH | -828.3(08)           | 3.17(62) | -19.0(1) |
